# Supplementary material for: The use of information and communication technologies to promote healthy lifestyle behaviour: a systematic scoping review
Source: PubMed Central journal article supplement — BMJ Open. 2019 Oct 28;9(10):e029872. doi: 10.1136/bmjopen-2019-029872 (PMC6830587; doi:10.1136/bmjopen-2019-029872), 2019-10-28
Supplement: bmjopen-2019-029872supp001.pdf [file bmjopen-2019-029872supp001.pdf]

**Supplementary file: Search strategy to identify articles that use ICTs to promote healthy lifestyle behaviour**

| Search engine                                                                                                                                                                                                                       | Keywords searched                                                                                                                                                                                                                                                                                                                                                                                            | No of publications retrieved |
|-------------------------------------------------------------------------------------------------------------------------------------------------------------------------------------------------------------------------------------|--------------------------------------------------------------------------------------------------------------------------------------------------------------------------------------------------------------------------------------------------------------------------------------------------------------------------------------------------------------------------------------------------------------|------------------------------|
| PsycArticle (EBSCO), PsycINFO (EBSCO), Academic Search Complete (EBSCO), CINAHL (EBSCO), Educational Source (EBSCO), Health Source – Consumer Edition (EBSCO), Health Source: Nursing Academic Edition (EBSCO), and Medline (EBSCO) | health promoting lifestyle profile OR health-promoting behaviour OR physical activity OR health responsibility OR nutrition OR interpersonal relation, OR stress management OR self-actualization OR spiritual growth OR wellness AND information and communication technology OR ICT OR mobile phone OR text messages OR SMS OR internet OR e-health OR m-health AND Adults OR workers OR employees         | 1,692                        |
| Google Scholar                                                                                                                                                                                                                      | health promoting lifestyle profile OR health-promoting behaviour OR physical activity OR health responsibility OR nutrition OR diet OR interpersonal relation, OR stress management OR self-actualization OR spiritual growth OR wellness AND information and communication technology OR ICT OR mobile phone OR text messages OR SMS OR e-health OR m-health OR internet AND Adults OR workers OR employees | 6041                         |
| Google Scholar                                                                                                                                                                                                                      | Health- promoting lifestyle behaviour OR wellness AND information and communication technology OR ICT OR mobile phone OR text messages OR SMS OR internet OR e-health OR m-health OR internet                                                                                                                                                                                                                | 1054                         |
| Google Scholar                                                                                                                                                                                                                      | Nutrition OR physical activity OR interpersonal relationships OR health responsibility OR stress management OR self-actualization AND information and communication technology OR ICT OR mobile phone OR e-health OR m-health OR text messages OR SMS OR internet                                                                                                                                            | 1117                         |
| Science direct,                                                                                                                                                                                                                     | Nutrition OR physical activity OR interpersonal relationships OR health responsibility OR stress management OR self-actualization AND information and communication technology OR ICT OR mobile phone OR text messages OR SMS OR internet OR e-health OR m-health AND adult                                                                                                                                  | 575                          |
| PubMed                                                                                                                                                                                                                              | Nutrition OR physical activity OR interpersonal relationships OR health responsibility OR stress management OR self-actualization AND information and communication technology OR ICT OR mobile phone OR text messages OR SMS OR internet OR e-health OR m-health AND adult                                                                                                                                  | 379                          |
